# Supplementary material for: Epigenetic Regulation by BAF Complexes Limits Neural Stem Cell Proliferation by Suppressing Wnt Signaling in Late Embryonic Development
Source: PubMed Central journal article supplement (PMC5993560; doi:10.1016/j.stemcr.2018.04.014), 2018-05-17
Supplement: mmc1.pdf [file mmc1.pdf]

**Stem Cell Reports, Volume 10**

**Supplemental Information**

**Epigenetic Regulation by BAF Complexes Limits Neural Stem Cell Proliferation by Suppressing Wnt Signaling in Late Embryonic Development**

**Huong Nguyen, Cemil Kerimoglu, Mehdi Pirouz, Linh Pham, Kamila A. Kiszka, Godwin Sokpor, M. Sadman Sakib, Joachim Rosenbusch, Ulrike Teichmann, Rho H. Seong, Anastassia Stoykova, Andre Fischer, Jochen F. Staiger, and Tran Tuoc**

SUPPLEMENTAL DATA

Figure S1

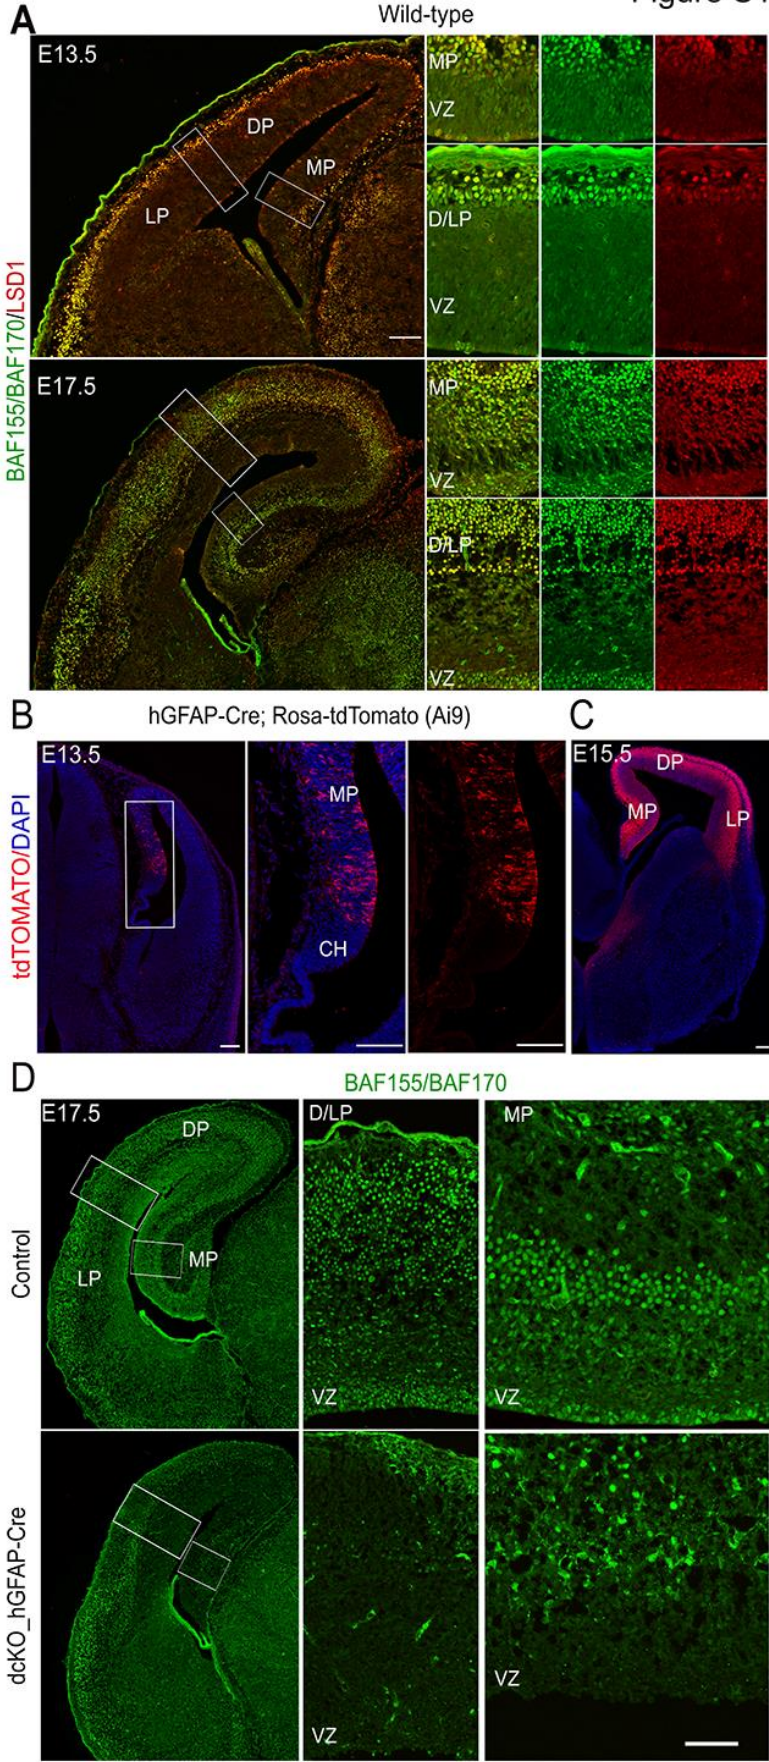

**Figure S1 (related to figure 1). Co-expression of BAF155/BAF170 with H3K4 and H3K27 demethylases in the developing pallium; hGFAP-Cre activity in the developing pallium; and expression of BAF155/BAF170 in the *dcKO\_hGFAP-Cre* pallium.**

(A) Double-label IF analysis with anti-BAF155/BAF170 (green) and anti-LSD1/KDM1A (red) antibodies, showing co-expression of BAF155/BAF170 with LSD1/KDM1A in pallium cells. Co-expression of BAF155/BAF170 with UTX/KDM6A or JMJD3/ KDM6B in the developing forebrain was analyzed previously (Narayanan et al., 2015). (B, C) Immunostaining for dtTomato on cortical sections from hGFAP-Cre; Rosa-tdTomato (Ai9) embryos at E13.5 (B) and E15.5 (C). (B) The right panels are higher-magnification images from the fields in the MP indicated by white frames. By E13.5, recombination is restricted in MP but absent from D/LP and cortical hem (CH) (B). From E15.5 onward, Cre recombination was detected in entire pallium (C). (D) Compared to controls, expression of BAF155 and BAF170 was largely lost in the *dcKO* pallium, as shown by IF analysis with anti-BAF155/BAF170 antibodies. Abbreviations: VZ, ventricular zone; MP, medial pallium; DP, dorsal pallium; LP, lateral pallium; CH, cortical hem. Scale bars = 100  $\mu$ m.

Figure S2

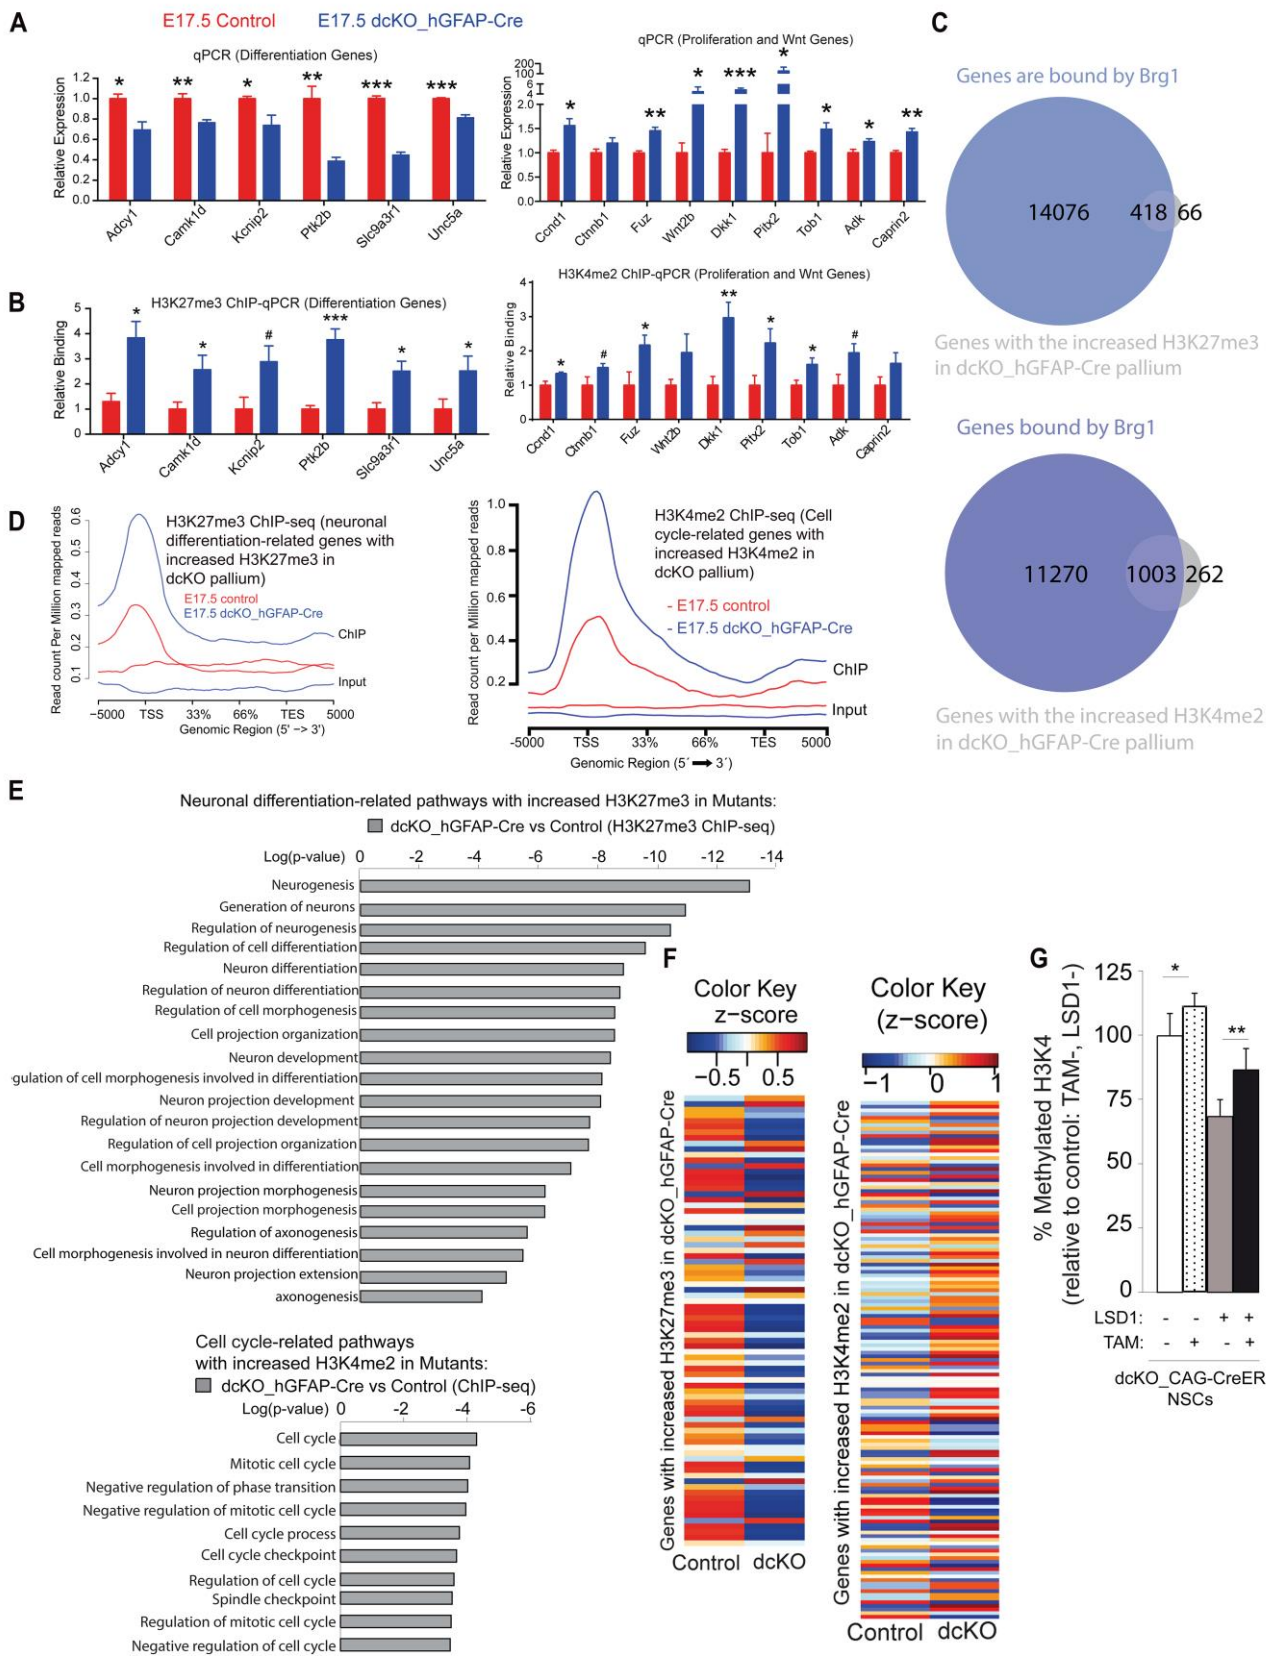

**Figure S2 (related to figures 1, 2, 4). Characterization of H3K27me3 and H3K4me2 marks in dcKO\_hGFAP-Cre cortex.**

(A) qPCR confirmation of selected neuronal differentiation-related genes downregulated, proliferation- and Wnt-related genes upregulated in dcKO\_hGFAP-Cre embryos at E17.5 (B) ChIP-qPCR confirmation of H3K27me3 levels at selected neuronal differentiation-related genes downregulated and H3K4me2 levels at selected proliferation and Wnt-related genes upregulated in dcKO\_hGFAP-Cre embryos at E17.5. (C) Overlap between genes bound by BRG1 (GSE37151; Attanasio et al., 2014) and those with increased H3K27me3 and those with increased H3K4me2 in dcKO embryos (hypergeometric test:  $p$ -value < 0.0001). (D) General profile plots of H3K27me3 at neuronal differentiation-related genes with increased H3K27me3 and H3K4me2 at cell cycle-related genes with increased H3K4me2 in dcKO\_hGFAP-Cre embryos ( $p$ -value < 0.0001, Student's t-test). (E) Neuronal differentiation-related genes have increased H3K27me3 and Cell cycle-related genes have increased H3K4me2 ( $p$ -value < 0.01) in dcKO\_hGFAP-Cre embryos at E17.5. (F) Heatmaps depicting the expression changes in neural differentiation-related genes that have increased H3K27me3 and in cell cycle-related genes that have increased H3K4me2 in dcKO\_hGFAP-Cre embryos at E17.5. (G) In the LSD1 demethylase activity quantification assay, cultured dcKO\_CAG-Cre NSCs were nucleofected with a mammalian expression vector for LSD1/KDM1A. The Cre-mediated deletion of BAF155 and BAF170 alleles was induced by adding TAM. Compared to control (LSD1<sup>-</sup>, TAM<sup>-</sup>, white bar), overexpression of LSD1 (LSD1<sup>+</sup>, TAM<sup>-</sup>, grey bar) decreased the methylated H3K4. In absence of BAF complexes (LSD1<sup>+</sup>, TAM, black bar) LSD1 displayed its low H3K4 demethylase activity. Values are presented as means  $\pm$  SEMs (\* $p$ -value < 0.05, \*\*\* $p$ -value < 0.01, \*\*\*\* $p$ -value < 0.005). Experimental replicates (n) = 4 (A, B), 6 (G).

Figure S3

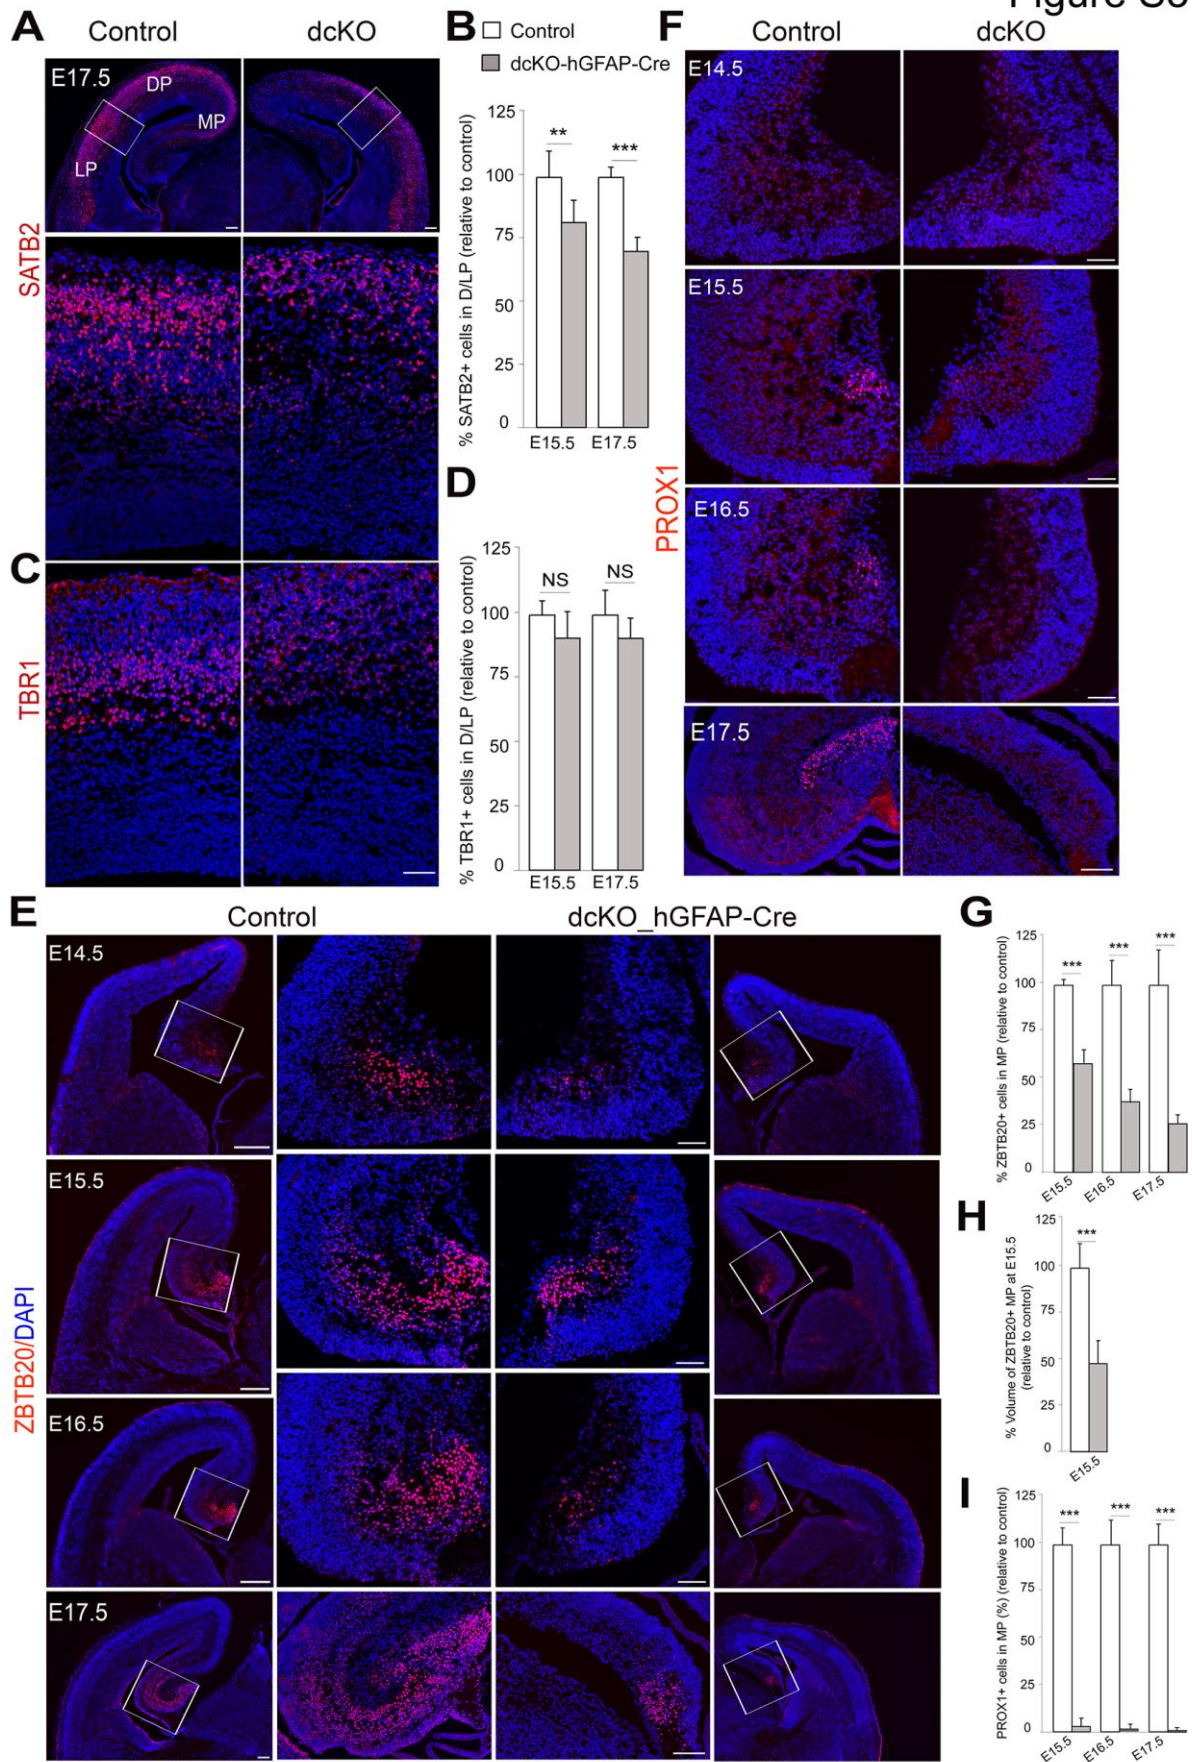

**Figure S3 (related to figures 2, 3). BAF155 and BAF170 are essential for neurogenesis in the developing cortex and hippocampus.**

(A–B) IF (A, C) and quantitative (B, D) analyses of the neurogenesis phenotype using the late-born neuronal marker SATB2 (A, B) and early-born neuronal marker TBR1 (C, D). (E - I) IF (E, F) and quantitative (G-I) analyses for the neuronal markers ZBTB20 in the hippocampus (E, G, H) and PROX1 in the dentate gyrus (F, I) revealed that hippocampal sections of the MP of mutants have a reduced number of ZBTB20<sup>+</sup> neurons and PROX1<sup>+</sup> neurons at E15.5–E17.5 compared to controls. (H) Quantification of the ZBTB20<sup>+</sup> hippocampal volume performed across the entire hippocampus using 3D reconstruction (see also Figure S5A and Movie S1). Values are expressed as means ± SEMs (\**P* < 0.05; \*\**P* < 0.01; \*\*\**P* < 0.005). Experimental replicates (n) = 6 (B, D, G, I), 4 (H). Abbreviations: MP, medial pallium; DP, dorsal pallium; LP, lateral pallium. Scale bars = 100 μm (10x; A,E), 50 μm (25x; A,C), and 50 μm (40x; E,F).

Figure S4

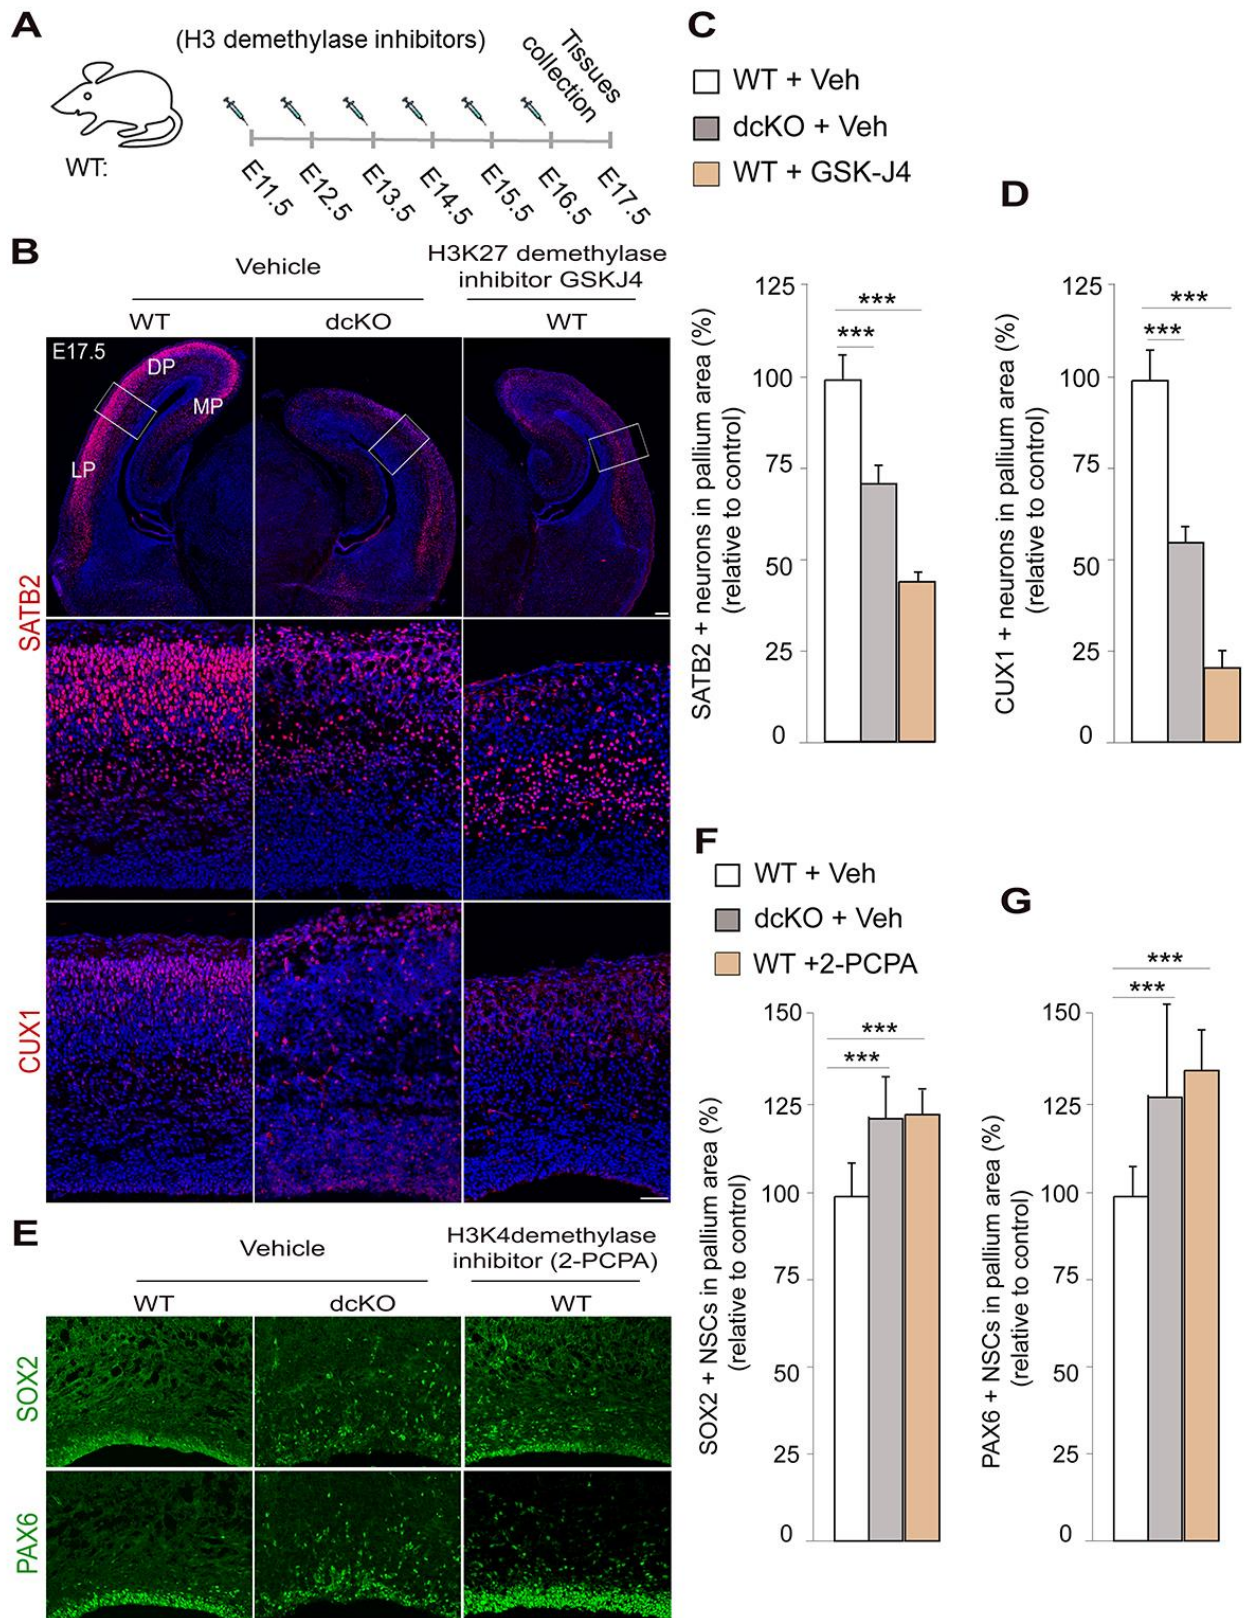



**Figure S4 (related to figures 2, 4). Elevated level of H3K27me3 and H3K4me2 by inhibition of H3K27 and H3K4me2 demethylases caused the defect in neuronal differentiation in developing pallium.**

(A) Experimental paradigms in which WT embryos were treated with H3K27 demethylase inhibitor GSK-J4 and H3K4 demethylase inhibitor 2-PCPA. (B–G) IF (B, E) and quantitative (C, D, F, G) analyses are to compare cortical phenotype of Veh-treated WT, Veh-dcKO and WT which is treated with GSK-J4 (a-d) or with 2-PCPA (e-g). (C, D) Statistical comparisons indicate that the increased level of H3K27me3 in cortices of dcKO embryos or GSK-J4 treated embryos decreased the number of late-born SATB2<sup>+</sup> (C) and CUX1<sup>+</sup> neurons (D) compared to Veh-treated WT. Likewise, the increased level of H3K4me2 in cortices of dcKO embryos or 2-PCPA treated embryos increased the number of SOX2<sup>+</sup> (F) and PAX6<sup>+</sup> NSCs (G) compared to Veh-treated WT. Values are expressed as means  $\pm$  SEMs ( $*P < 0.05$ ;  $**P < 0.01$ ;  $***P < 0.005$ ). Experimental replicates (n) = 4 (C, D, F, G). Abbreviations: MP, medial pallium; DP, dorsal pallium; LP, lateral pallium. Scale bars = 100  $\mu$ m (10x, B) and 50  $\mu$ m (40x, B).

Figure S5

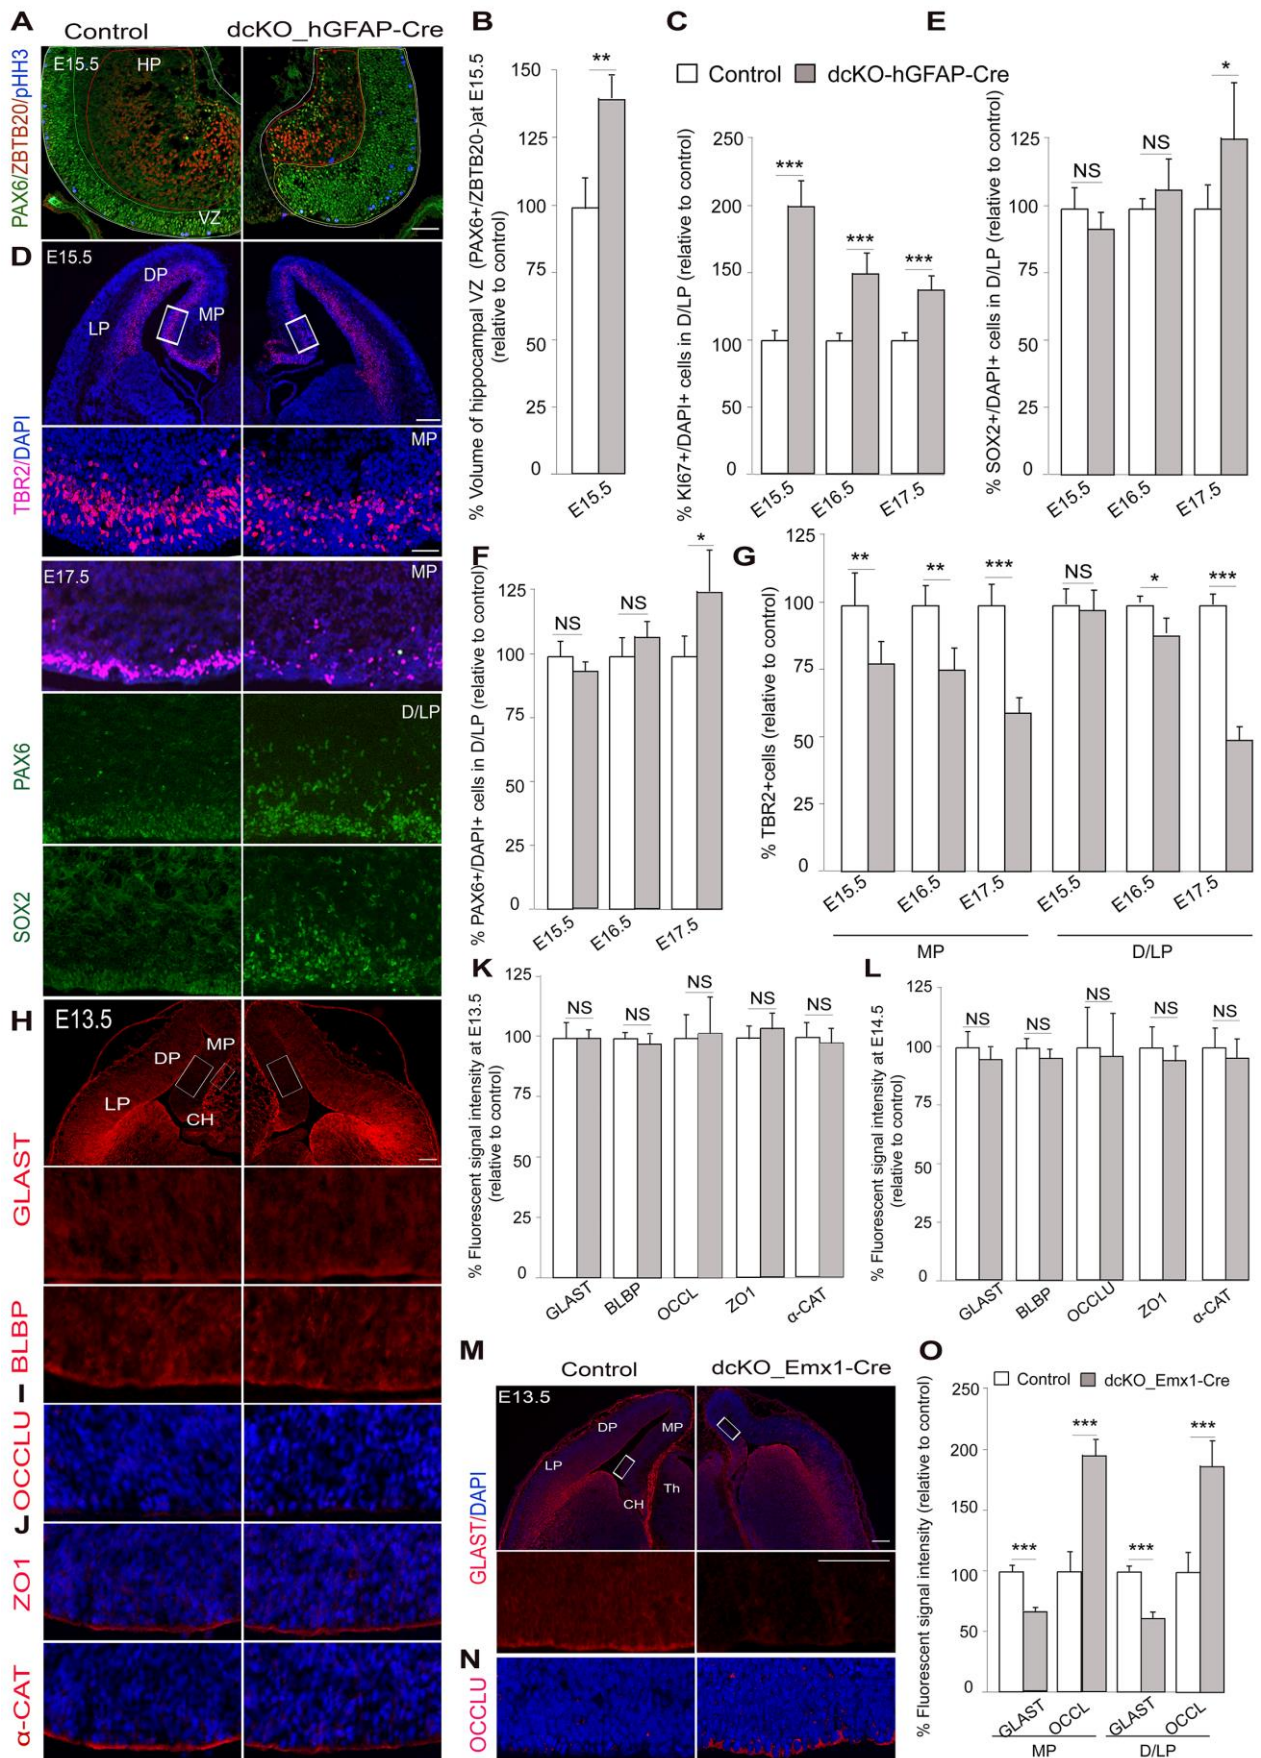

**Figure S5 (related to figures 4, 5). Loss of BAF155 and BAF170 in dcKO mutants has a profound effect on the pool of NSCs, expression of adherens junction molecules.**

(A) Representative images of triple IF analysis of PAX6 to visualize hippocampal VZ, ZBTB20 to mark hippocampal plate (HP) and PHH3 to label mitotic M-phase cells in our 3D reconstruction analysis. Total hippocampal volume was surrounded by white line. (B) Quantitative analyses of the volume of the hippocampal VZ (PAX6<sup>+</sup>/ZBTB20<sup>-</sup>) in the dcKO\_*hGFAP*-Cre mutant and control at E15.5 (see also Movie S1 for 3D reconstruction analysis). (C–G) IF (D) and quantitative (C, E, F and G) analyses of the mitotic marker KI67 (C), RG markers PAX6 and SOX2 (D, E and F), and IP marker TBR2 in the MP and D/LP of dcKO\_*hGFAP*-Cre mutants and control (G). Generally, the loss of BAF155 and BAF170 in dcKO\_*hGFAP*-Cre mutants had a more profound effect on the pool of NSCs in the MP (see also Fig. 4E–L) than in the D/LP. It should be noted that the loss of BAF155 and BAF170 in the E15.5–E16.5 D/LP did not affect the pool of PAX6<sup>+</sup>/SOX2<sup>+</sup> RGs; however, the number of KI67<sup>+</sup> active mitotic progenitors was already increased. Counting was done in selected frames, denoted by white boxes. (H–L) IF (H–J) and quantitative (K, L) analyses revealed that in contrast to later stages (E15.5, E16.5), there is no obvious difference in expression level of GLAST, BLBP, ZO1,  $\alpha$ -CATENIN and OCCLUDIN between the control and dcKO\_*hGFAP*-Cre pallium at E13.5 and E14.5. (M–O) Immunostaining of coronal sections from the control and dcKO\_*Emx1*-Cre pallium at E13.5 for GLAST (M) and OCCLUDIN (N) revealed an altered cell identity from GLAST<sup>high+</sup>/OCCLUDIN<sup>-</sup> RGs in controls to GLAST<sup>low+</sup>/OCCLUDIN<sup>high+</sup> NEs in the dcKO\_*Emx1*-Cre mutant. (O) Quantitative analyses of panels M–N are shown. Values are expressed as means  $\pm$  SEMs (\**P* < 0.05; \*\**P* < 0.01; \*\*\**P* < 0.005). Experimental replicates (n) = 4 (B), 6 (C, E, F, G, K, L, O). Abbreviations: MP, medial pallium; DP, dorsal pallium; LP, lateral pallium; HP, hippocampal plate; VZ, ventricular zone; CH, cortical hem; Th, thalamus. Scale bar = 100  $\mu$ m.

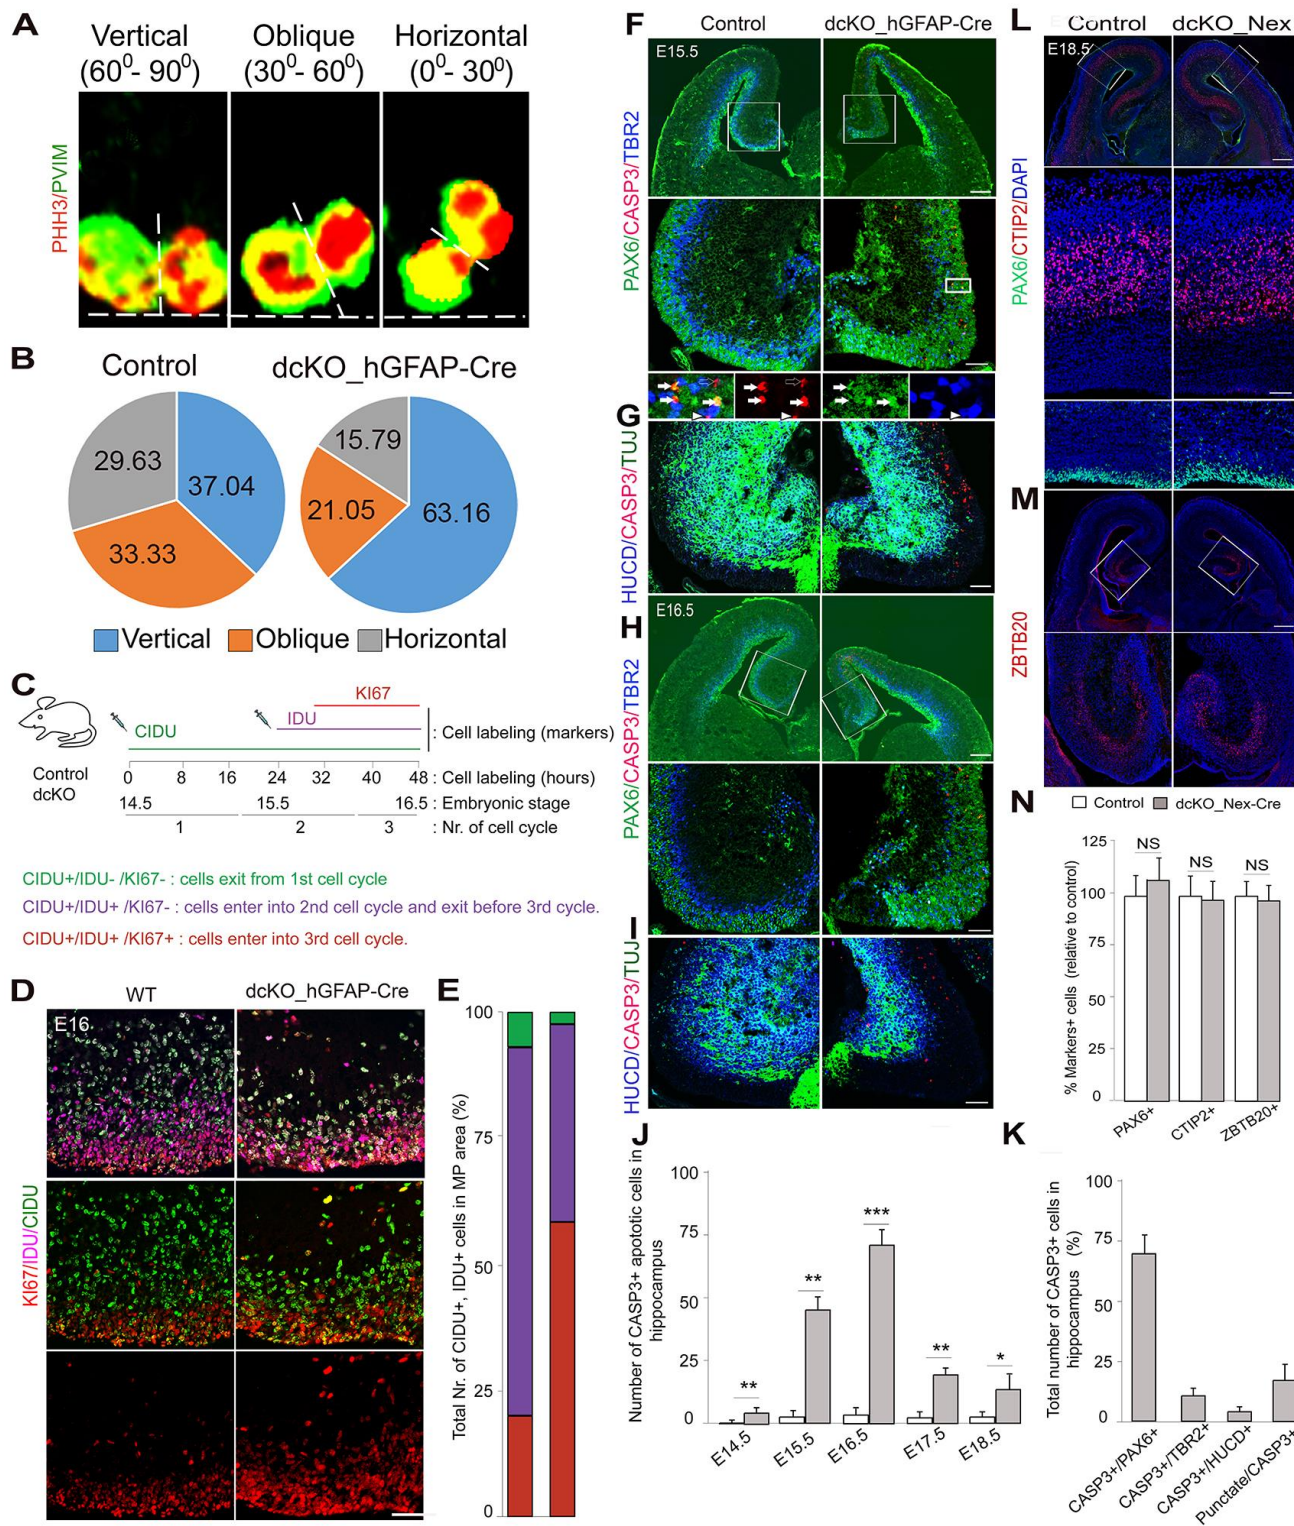

**Figure S6 (related to figures 2-5). The spindle orientation, selective apoptosis of RGs in *dcKO\_hGFAP-Cre* mutants and phenotypes of cortical neuron-specific *dcKO\_Nex-Cre* mutants.**

(A, B) IF analyses in control and *dcKO* mutants using antibodies against PHH3 and PVIM, to visualize the orientation of spindles (vertical, oblique, horizontal) (A), and quantitative analyses (B) indicate that loss of BAF155 and BAF170 induces proliferative, symmetric division. (C) Experimental paradigm for determining cell-cycle parameters and color scheme for immunolabeling of micrographs (in D). (D) Images show triple-label IHC of cortical sections with antibodies for CIDU (48-h labeling), IDU (24-h labeling) to mark both exited and cycling progenitors, KI67 to label proliferating progenitors at E16.5. (E) Statistical comparisons indicated a decreased number of cells, which exit from 1<sup>st</sup> and 2<sup>nd</sup> cell cycles and an increased number of progenitors, which enter the 3<sup>rd</sup> cycle in the medial pallium of *dcKO* embryos compared with control. (F-K) Triple IF for PAX6/TBR2/CASP3 and HuCD/TUBB3/CASP3 (F–I) and quantitative analyses (J, K) show that the developing hippocampus of the *dcKO-hGFAP-Cre* embryo has a high number of CASP3<sup>+</sup> apoptotic cells at E14.5–E18.5 (F–J). Notably, most CASP3<sup>+</sup> cells are immunoreactive for PAX6 (white filled arrows) or exhibit punctate forms (late phase of apoptosis, empty arrows), whereas less extended cells are TBR2<sup>+</sup> IPs and HUCD<sup>+</sup>/TUBB3<sup>+</sup> neurons (F, H, K; arrowhead). Lower panels are higher-magnification images from the fields indicated by white rectangles. Noted that a similar image of single channel for Pax6 is shown in Figure 4F. (L–N) Phenotype analysis of the pallium from neuron-specific *dcKO\_Nex-Cre* mutants. Immunostaining of coronal sections of E18.5 brains with antibodies specific for RGs (PAX6; L), layer 5 neurons (CTIP2; L) and hippocampal neurons (ZBTB20; M), and quantification of results in (L) showed no discernible differences in the number of immunopositive cells between the *dcKO\_Nex-Cre* and control pallium. Values are presented as means  $\pm$  SEMs (\* $P < 0.05$ , \*\*\* $P < 0.01$ , \*\*\*\* $P < 0.005$ ). Experimental replicates (n) = 6 (E, J, K), 4 (N). Scale bars = 100  $\mu$ m (10x; F, H, L, M), 50  $\mu$ m (40x; F, G, H and I), 100  $\mu$ m (L) and 50  $\mu$ m (D).

Figure S7

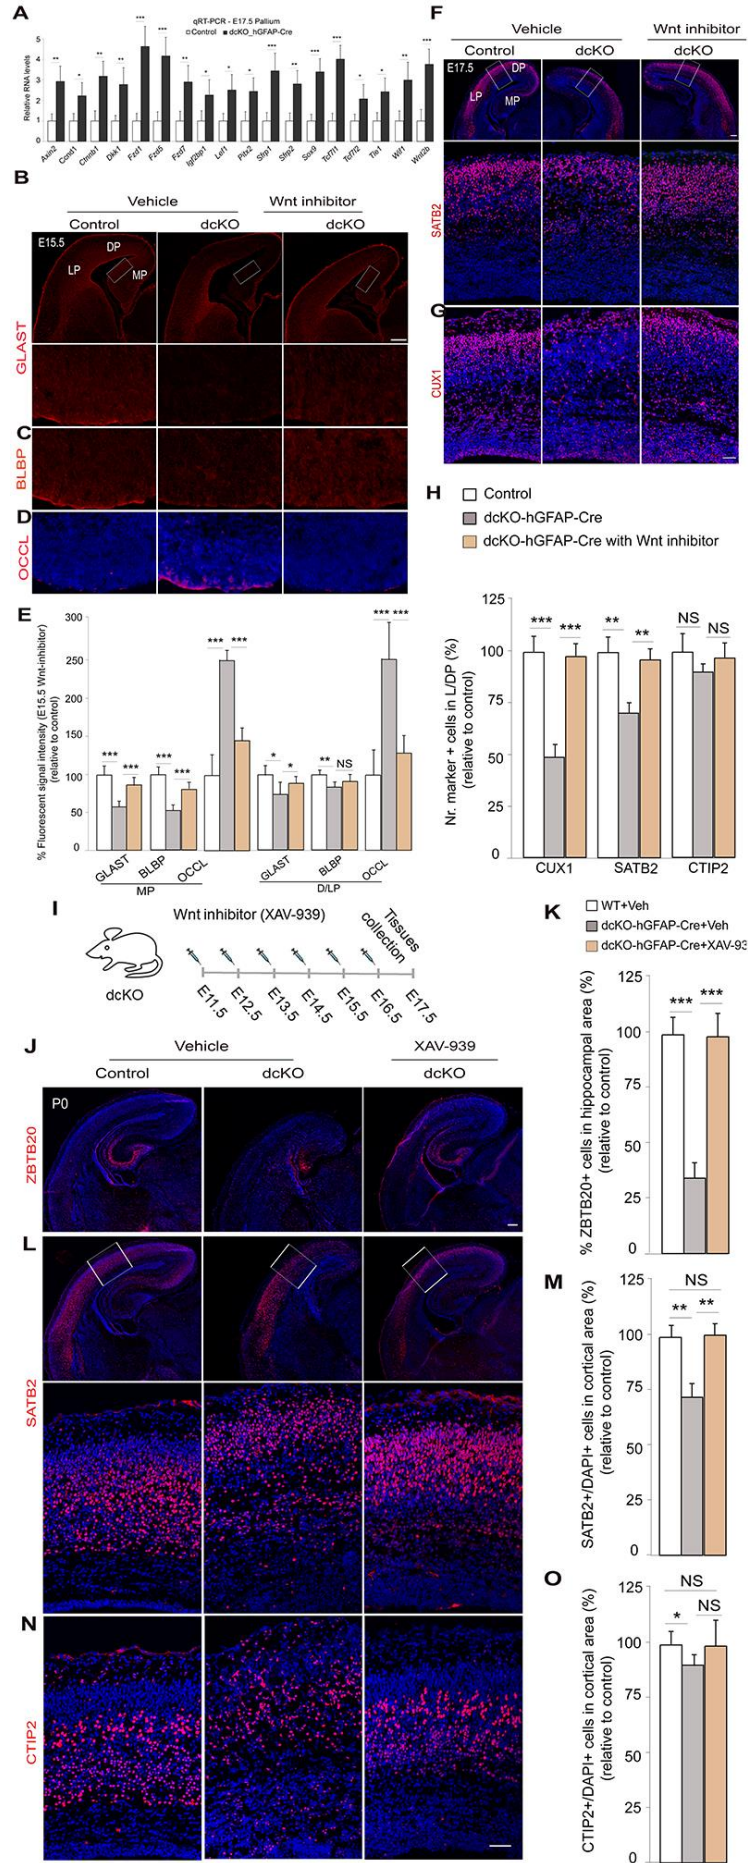

**Figure S7 (related to figures 6, 7). Suppression of Wnt signaling in the developing pallium by BAF complexes in the developing forebrain.**

(A) Expression of upregulated Wnt genes identified by RNA-Seq analysis (see Fig. 6A, B) was further verified by qRT-PCR. (B–E) IF (B–D) and quantitative (E) analyses of *dcKO\_hGFAP-Cre* mutants at E15.5 showing the effects of treatment with the Wnt inhibitor ICG-001 on expression of the RG markers GLAST (B) and BLBP (C), and the NE marker OCCLUDIN (D). IF (F–G) and quantitative (H) analyses of *dcKO\_hGFAP-Cre* mutants at E17.5, showing the effects of treatment with WNTi on pools of SATB2<sup>+</sup> (F), CUX1<sup>+</sup> (G) cortical neurons in L/DP. Quantitative analyses indicated that inhibition of Wnt signaling largely rescues defects in L/DP in *dcKO\_hGFAP-Cre* mutants (H). (I–O) Rescued cortical defects in *dcKO\_hGFAP-Cre* mutant by Wnt inhibitor XAV-939. (I) Experimental paradigm in which WT (control), *dcKO* embryos were treated with Wnt inhibitor XAV-939 or Vehicle (Veh). (J–O) IF (J, L, N) and quantitative (K, M, O) analyses are to compare population of cortical neuron: ZBTB20<sup>+</sup> hippocampal neurons (J, K), SATB2<sup>+</sup> late-born neurons (L, M), CTIP2<sup>+</sup> early-born neurons (N, O) in Veh-treated WT, Veh-treated *dcKO* and WNTi-treated WT. Quantitative analyses indicated that inhibition of Wnt signaling by XAV-939 largely rescues the neurogenesis defects in *dcKO\_hGFAP-Cre* mutants. Values are expressed as means ± SEMs (\**P* < 0.05; \*\**P* < 0.01; \*\*\**P* < 0.005; *n* = 4). Experimental replicates (*n*) = 4 (A, H, K, M, O), 6 (E). Abbreviations: MP, medial pallium; DP, dorsal pallium; LP, lateral pallium. Scale bars = 100 μm (10x; B, F), 50 μm (40x; G), 100 μm (10x; J), and 50 μm (40x; N).

## **SUPPLEMENTAL EXPERIMENTAL PROCEDURES**

### **Transgenic mice**

*BAF155<sup>ff</sup>* (Choi et al., 2012), *BAF170<sup>ff</sup>* (Tuoc et al., 2013), *Emx1-Cre* (Gorski et al., 2002), *hGFAP-Cre* (Zhuo et al., 2001), *Nex-Cre* (Goebbels et al., 2006) and *Rosa-tdTomato (Ai9)*(Madisen et al., 2010) mice were maintained in a C57BL6/J background. Animals were handled in accordance with the German Animal Protection Law.

### **Plasmids**

Plasmids used in this study: pCIG2-ires-eGFP, pCIG2-Cre-ires-eGFP (gift from Dr Francois Guillemot, NIMR London); 8XTOPFLASH (TOP) (Veeman et al., 2003) and Super8XFOPFLASH (FOP) (Veeman et al., 2003) were gifts from Randall Moon (Addgene plasmid # 12456, 12457)

### **Antibodies**

The following polyclonal (pAb) and monoclonal (mAb) primary antibodies used in this study were obtained from the indicated commercial sources: AP2 $\gamma$  mouse mAb (1:100; Cat. ab87475, Abcam), BAF170 rabbit pAb (Cat. IHC-00213; Bethyl), BAF170 rabbit pAb (Cat. HPA021213; Sigma), BAF155 rabbit pAb (1:20; Cat. sc-10756; Santa Cruz), BAF155 mouse mAb (1:100; Cat. sc-48350X; Santa Cruz), Brn2 goat pAb (1:100; Cat. sc-6029, Santa Cruz), BLBP rabbit pAb (1:200; Cat. AB9558/ABN14; Chemicon), CASP3 rabbit pAb (1:100; Cat. #9661S; Cell Signaling), CTIP2 rat pAb (1:200; Cat. ab18465; Abcam), GLAST pig pAb (1:500; Cat. Af1000-1; Frontier), CIDU rat pAb (1:100; Cat. OBT-0030; Accurate), H3K27me3 rabbit pAb (Cat. 07-449; Upstate),



KDM6A/UTX rabbit pAb (Cat. sc-292326; Santa Cruz), KDM6B/jmjd3 rabbit pAb (De Santa et al., 2007), KI67 rabbit pAb (1:50; Cat. VP-RM04; Vector), HuCD mouse mAb (1:20; Cat. A21271; Invitrogen), LSD1 rabbit pAb (1:100; Cat. #2139s; Cell Signaling), SATB2 mouse mAb (1:200; Cat. ab51502; Abcam), SOX2 mouse mAb (1:100; Cat. MAB2018; R&D Systems), PROX1 rabbit pAb (1:1000; Cat. PRB-238C; Covance), PAX6 mouse mAb (1:100; Developmental Studies Hybridoma Bank), PAX6 rabbit pAb (1:200; Cat. PRB-278P; Covance), Flag mouse mAb (1:1000; Cat. F1804 Sigma), phospho-H3 rabbit mAb (1:200; Cat. Millipore), phospho-H3 rat pAb (1:300; Cat. Abcam), PVIM mouse mAb (1:500; Cat. D076-3 MBL), OCCLUDIN rabbit pAb (1:50; Cat. 40-4700 Thermo Fisher), TUBB3 mouse mAb (Tuj1, 1:500; Cat. Chemicon), TBR2 rabbit pAb (1:200; Cat. ab23345; Abcam), TBR1 rabbit pAb (1:300; Cat. AB9616; Chemicon), ZBTB20 rabbit pAb (1:50; Cat. HPA016815; Sigma), and RFP rabbit pAb (1:10000; Cat. 600-401-379; Biomol/Rockland).

Secondary antibodies used were horseradish peroxidase (HRP)-conjugated goat anti-rabbit IgG (1:10000; Cat. 111-035-003; Covance), HRP-conjugated goat anti-mouse IgG (1:5000; Cat. 115-035-003; Covance), HRP-conjugated goat anti-rat IgG (1:10000; Cat. 112-035-143; Covance), and Alexa 488-, Alexa 568-, Alexa 594- and Alexa 647-conjugated IgG (various species, 1:400; Molecular Probes).

### **Generation of dcKO mutants**

To eliminate *BAF155* and *BAF170* in early cortical progenitors, late cortical progenitors, or projection neurons, we used the early progenitor-active *Emx1-Cre* (Gorski et al., 2002), late progenitor-active *hGFAP-Cre* (Zhuo et al., 2001) and neuron-specific *Nex-Cre* (Goebbels et al., 2006) mouse lines, respectively. Heterozygous

animals (*BAF155<sup>fl/+</sup>*, *BAF170<sup>fl/+</sup>*, *Cre*) were used as controls. Mutants crossed with *Emx1-Cre* or *hGFAP-Cre* died soon after birth.

### **Chromatin immunoprecipitation (ChIP)**

ChIP assays performed on the pallium from control (n = 4) and *dcKO\_hGFAP-Cre* E17.5 (n = 4) littermate embryos were performed as described previously (Narayanan et al., 2015). Briefly, tissues were homogenized in sucrose solution (0.32 M sucrose, 5 mM CaCl<sub>2</sub>, 5 mM Mg(Ac)<sub>2</sub>, 0.1 mM EDTA, 50 mM HEPES pH 8, 1 mM DTT, 0.1% Triton X-100), and then fixed in 37% formaldehyde. After stopping fixation by adding 1.25 M glycine, samples were washed with Nelson buffer (140 mM NaCl, 20 mM EDTA pH 8, 50 mM Tris pH 8, 0.5% NP-40, 1% Triton X-100) and sonicated in RIPA buffer (140 mM NaCl, 1 mM EDTA, 1% Triton X-100, 0.1% sodium deoxycholate, 10 mM Tris pH 8, 1% SDS).

For ChIP against histone marks 500 ng of chromatin with either 4 µg of anti-H3K4me2 antibody (Millipore) or 2 µg of anti-H3K27me3 antibody (Millipore) were used for each experiment, with input DNA of 50 ng. For ChIP against histone demethylases 10 µg of chromatin with either 10 µg of anti-LSD1 antibody (Abcam) or 10 µg of anti-JMJD3 antibody (Abcam) were used for each experiment with input DNA of 100 ng. After incubating overnight, samples were incubated with 15 µl of Protein A-coated beads (Diagenode) that had been blocked by incubating with 0.5% bovine serum albumen (BSA). Beads were washed with IP buffer (140 mM NaCl, 1% NP-40, 0.5% sodium deoxycholate, 50 mM Tris pH 8, 20 mM EDTA, 0.1% SDS) and wash buffer (100 mM Tris pH 8, 500 mM LiCl, 1% NP-40, 1% sodium deoxycholate, 20 mM EDTA), and chromatin was eluted with 0.1 µg/µl of RNase A diluted in 10 mM Tris (pH 8). De-

crosslinking was carried out in Wiemann buffer (100 mM Tris pH 8, 20 mM EDTA, 2% SDS) with Proteinase K (1 µg/µl). DNA was eluted in 10 mM Tris (pH 8).

## ChIP-Sequencing

Libraries were prepared with a NEBNext Ultra DNA Library Prep Kit for Illumina (NEB) and analyzed using QuBit and an Agilent 2100 Bioanalyzer. Input DNA (50 ng) was isolated from each sample and then pooled separately for each group.

Base calling and FASTQ conversions were performed using standard Illumina scripts, as described previously (Halder et al., 2016; Narayanan et al., 2015). Quality control was also performed for each sample using FastQC ([www.bioinformatics.babraham.ac.uk/projects/fastqc](http://www.bioinformatics.babraham.ac.uk/projects/fastqc)). Reads were mapped to the mm10 mouse reference genome using STAR aligner v2.3.0 (Djebali et al., 2012). BAM files were filtered leaving only high-quality reads [MAPQ !=(0,2,3,4)] as described previously (Halder et al., 2016).

BAM files of replicates from the same group were combined using the *merge* function of SAMTools (Li et al., 2009). Genomic profile plots were created from combined BAM files using NGSPlot (Shen et al., 2014). Wiggle (WIG) files were created from these BAM files using the script available in the MEDIPS package of Bioconductor (Lienhard et al., 2014). Visualization of individual gene loci was performed with Integrated Genome Browser (Nicol et al., 2009) using these WIG files.

Peaks were called using MACS2, with  $q < 0.1$  (Feng et al., 2012). Differential binding analyses were performed using the DiffBind package of Bioconductor (Ross-Innes et al., 2012) with the DESEQ2 option for differential analysis. Peak annotation was performed using HOMER (Heinz et al., 2010) and homemade scripts.

## **RNA-Sequencing**

RNA was extracted (RNeasy kit; Qiagen) from the pallium of control (n = 4) and *dcKO\_hGFAP-Cre* (n = 3) E17.5 littermate embryos. cDNA libraries were prepared using the TruSeq RNA Sample Preparation v2 Kit. DNA was quantified using a Nanodrop spectrophotometer, and its quality was assessed using an Agilent 2100 Bioanalyzer.

Base calling, fastq conversion, quality control, and read alignments were all performed as outlined for ChIP-Seq. Reads were aligned to mouse genome mm10 and counted using FeaturesCount (<http://bioinf.wehi.edu.au/featureCounts/>). Differential expression was assessed using DESeq2 from Bioconductor (Love et al., 2014). Functional GO enrichment analyses were performed using ToppGene (Chen et al., 2009).

The high-throughput RNA-seq and ChIP-Seq data will be deposited in the NCBI Gene Expression Omnibus and made accessible through GEO Series accession numbers upon acceptance of the manuscript.

## **qPCR, ChIP-qPCR and Western blot analyses**

qPCR and Western blot analyses were performed as described previously (Tuoc and Stoykova, 2008). Briefly, qPCR for confirmation of gene expression changes cDNA was synthesized using Transcriptor High Fidelity cDNA Synthesis Kit (Roche) and the results were normalized to housekeeping gene hypoxanthine phosphoribosyltransferase (*Hprt1*). For ChIP-qPCR the results were normalized against input DNA. All qPCR reactions were performed in Roche 480 Light Cycler using

SYBR Green. To validate the upregulated expression of Wnt-related genes in our RNA-Seq dataset, we performed qPCR using the mouse WNT Signaling Pathway RT2 Profiler PCR Array (PAMM-043Z; Qiagen) and mouse WNT Signaling Targets RT2 Profiler PCR Array (PAMM-243Z; Qiagen). The following primers were used for gene expression qPCR (5' – 3'):

| <b>Primer</b>   | <b>Sequence (5' - 3')</b>  |
|-----------------|----------------------------|
| Adk_forward     | CGCAGAATTCAATGAAAGTGG      |
| Adk_reverse     | GCATCCAAAGAATGTTGCTG       |
| Adcy1_forward   | AGATGGGACTTGACATGATCG      |
| Adcy1_reverse   | CGCATGTTTCAGGTCTACTTCAG    |
| Camk1d_forward  | GAGTTTGATTCCCCCTACTGG      |
| Camk1d_reverse  | TCCATCAGATTCCGAATGAAG      |
| Caprin2_forward | AGTTAAATGTAGAACCCAAAGATGTG |
| Caprin2_reverse | CCTCAATACTGGATCCTTTGGA     |
| Ccnd1_forward   | TTTCTTTCCAGAGTCATCAAGTGT   |
| Ccnd1_reverse   | TGACTCCAGAAGGGCTTCAA       |
| Ctnnb1_forward  | TGCAGATCTTGGACTGGACA       |
| Ctnnb1_reverse  | AAGAACGGTAGCTGGGATCA       |
| Dkk1_forward    | CCGGGAACACTGCAAAAAT        |
| Dkk1_reverse    | CCAAGGTTTTCAATGATGCTT      |
| Fuz_forward     | CCTTAGAACTTCTACACGCTGGT    |

|                  |                                                                                                                               |
|------------------|-------------------------------------------------------------------------------------------------------------------------------|
| Fuz_reverse      | GGCTGGGTAGACTGTGTCCT                                                                                                          |
| Kcnip2_forward   | CTGCCCTCAGTCAGTGAAAA                                                                                                          |
| Kcnip2_reverse   | GTGGCACACCGTGGATAGTT                                                                                                          |
| Pitx2_forward    | CCTTACGGAAGCCCGAGT                                                                                                            |
| Pitx2_reverse    | AAAGCCATTCTTGACAGC                                                                                                            |
| Ptk2b_forward    | CTCCTCCACAGACCAACCTG                                                                                                          |
| Ptk2b_reverse    | AGGAGAGCTGGCACACAGAC                                                                                                          |
| Slc9a3r1_forward | CCCTTCAGCAATGGAGAGATAC                                                                                                        |
| Slc9a3r1_reverse | TGGGGCTCTCTGAAGCTG                                                                                                            |
| Tob1_forward     | ACTTTTGCTGCCACCAAGTT                                                                                                          |
| Tob1_reverse     | GAGCTACCTTGCTGCTACGG                                                                                                          |
| Unc5a_forward    | CGTCATTGAACGCAGCAC                                                                                                            |
| Unc5a_reverse    | GATACGTTGATCCGGACCTC                                                                                                          |
| Wnt2b_forward    | GGGCCCTCATGAACTTACAC                                                                                                          |
| Wnt2b_reverse    | CCACTCACACCGTGACACTT                                                                                                          |
| Hprt1_forward    | GACAGGGACTIONACTGCATAGTTT                                                                                                     |
| Hprt1_reverse    | GAGGCCAAGACAAGAAGACG                                                                                                          |
| Others           | Ordered from GeneGlobe, Qiagen<br>( <a href="https://www.qiagen.com/us/geneglobe/">https://www.qiagen.com/us/geneglobe/</a> ) |

And the following primers were used for CHIP-qPCR (5' – 3'):

| <b>Primer</b>   | <b>Sequence (5' - 3')</b>  |
|-----------------|----------------------------|
| Adcy1_forward   | GTGGCCCTTGCTGCATAC         |
| Adcy1_reverse   | CCAGCAGGCTCCTAACACC        |
| Adk_forward     | GCGCTCAGTGTCTGATGACTT      |
| Adk_reverse     | TGATGCGTCTATTTTTAGGTAGCA   |
| Camk1d_forward  | GGAAATGTTAAGTTTTCTTTGTAGCA |
| Camk1d_reverse  | CAATTCAGCCGAACAGCTC        |
| Caprin2_forward | TGCCCCACAGATGATTTTTTC      |
| Caprin2_reverse | TGGCGCATACCCTCCTACTA       |
| Ccnd1_forward   | GGGGCTTCTTTCCCTAAGAG       |
| Ccnd1_reverse   | CCTCCCTCCTAGCTGTCCTC       |
| Ctnnb1_forward  | TCCCAGGCTGAAGTCCTTAAT      |
| Ctnnb1_reverse  | ACTCTGTCCCAGGCAAGCTA       |
| Dkk1_forward    | GCTCCTCAGGGAAGACAACA       |
| Dkk1_reverse    | CGAGGGGAGAGTGTCAAAGT       |
| Fuz_forward     | CGTGGTTTTTCATGATTTTGGGA    |
| Fuz_reverse     | CCACCAAATGAGATGGTTGTT      |
| Kcnp2_forward   | GTGTCACACACGCCTACACC       |
| Kcnp2_reverse   | GGGCTGAGGAAGAACAGGT        |
| Pitx2_forward   | ACTCCGACCCGAAGAAGG         |

|                  |                       |
|------------------|-----------------------|
| Pitx2_reverse    | TGGTGGCAAGACGTCACTC   |
| Ptk2b_forward    | CAGTCCTGCAGAGACAACAGA |
| Ptk2b_reverse    | GATGTGGCATGTGGCTTG    |
| Slc9a3r1_forward | AGACATCCGTCCGGTTCTTA  |
| Slc9a3r1_reverse | TGCTCCCCCACACTCACT    |
| Tob1_forward     | CACTCCGGACGATAACTCG   |
| Tob1_reverse     | ACTCTAGGGGCGCGGATA    |
| Unc5a_forward    | CATCCAGTTTGAATGGAGAGC |
| Unc5a_reverse    | ATGGCTGACATCCACATTCTC |
| Wnt2b_forward    | GGTACCACCGTAGGCAACC   |
| Wnt2b_reverse    | GGAGGGAAACGTTGAGTCCTT |

### **Co-immunoprecipitation and mass spectrometry (CoIP/MS)**

BAF155 and BAF170 interaction analyses were performed using the neural stem cell line, NS5 (Conti et al., 2005), and E13.5 and E17.5 embryonic telencephalic tissue. Tissues were dissected and minced in cold phosphate-buffered saline (PBS) and then washed twice with PBS. Equivalent amounts of cells from one embryo were lysed for 30 min in 1 ml RIPA buffer containing a proteinase inhibitor cocktail (Roche) and DNase. All steps were performed at 4°C. Lysates were centrifuged for 10 min at 13,000 rpm to sediment out non-lysed tissues. The supernatant was pre-cleared by incubating with normal mouse IgG together with protein A/G-agarose beads, as described by the manufacturer (sc-2003; Santa Cruz). Interacting proteins were immunoprecipitated by



incubating pre-cleared supernatant with rabbit anti-BAF155 and anti-BAF170 antibodies and A/G-agarose beads. The beads were then washed first with 500 µl cold RIPA buffer (three times for 5 min each) and then with 40 µl of elution buffer (2.5 µl 20% SDS, 5 µl 1 M NaHCO<sub>3</sub>, 42.5 µl double-distilled H<sub>2</sub>O) for 15 min at room temperature.

For MS analyses (performed in the department of Prof. Dr. Henning Urlaub), samples were suspended in NuPage loading buffer and resolved on commercial SDS polyacrylamide gels (Novex NuPage Bis-Tris gel, 4–12% gradient; Invitrogen). Individual lanes were then cut into six squares for MS analysis. The parameters for the identification of proteins were set to the following values: limit, 95% probability of detection; limit of unique peptides detected, 1; and threshold detection probability of peptides, 80%.

The list of BAF155- and BAF170-interacting proteins revealed by MS analysis was obtained by subtracting nonspecific interactions with IgG in IPs and in telencephalic tissues from BAF155-null (*BAF155cKO\_FoxG1-Cre*) and BAF170-null (*BAF170cKO\_FoxG1-Cre*) mutants. The first set of controls excludes nonspecific binding to the antibody, and the second excludes nonspecific interactions that possibly could be precipitated by either the anti-BAF155 or anti-BAF170 antibody.

**Injection of Wnt inhibitor (WNTi, ICG 001, XAV-939) and Wnt activator (WNTa, SB-216763), H3K27 demethylase inhibitor (GSK-J4), LSD1 histone demethylase (2-PCPA).**

ICG001 (Tocris Bioscience, Cat. No. 4505), XAV-939 (Tocris Bioscience, Cat. No. 3748), SB-216763 (Tocris Bioscience, Cat. No. 1616), GSK-J4 (SIGMA, Cat. No. SML0701) and 2-PCPA (Tocris Bioscience, Cat. No. 3852) were dissolved in vehicle

(DMSO). 11.5 d.p.c. pregnant mice received daily injections of vehicle (150  $\mu$ l), or ICG001 (150  $\mu$ l of a 1-mg/ml solution), XAV-939, (150  $\mu$ l of a 0.2 mg/ml solution), SB-216763 (100  $\mu$ l of a 1-mg/ml solution plus 100  $\mu$ l of saline), GSK-J4 (150 $\mu$ l of 2.5mg/ml solution)) and 2-PCPA (150 $\mu$ l of 5 mg/ml solution). Treated mice were sacrificed at different developmental stages as indicated in the text.

### **In vivo $\beta$ -catenin transcriptional activity assay**

In vivo and in vitro  $\beta$ -catenin transcriptional activity assay were performed as previously described (Durak et al., 2016; Mao et al., 2009). Briefly, Wnt/ $\beta$ -catenin transcriptional activity in vivo was monitored by electroporating brains of E13.5 *BAF155<sup>fl/fl</sup>;BAF170<sup>fl/fl</sup>* embryos with a Cre plasmid (or empty plasmid as a control) and the reporter constructs Super8XTOPFLASH (TOP) or Super8XFOPFLASH (FOP) together with pRL-TK constructs at a 5:1:0.3 ratio. Wnt/ $\beta$ -catenin transcriptional activity was measured at E15.5. For in vitro assay, Neuro2A cells at  $1 \times 10^5$  per well density were plated into 24-well plates. Cells were transfected with 0.8  $\mu$ g of shRNA plasmids (shBAF155, shBAF170) along with 50 ng of Super8XTOPFLASH and 10 ng of pRL-TK. 2 days post-transfection, cells were collected for Wnt/ $\beta$ -catenin transcriptional activity measurement. In all cases, firefly luciferase activity was normalized to that of Renilla luciferase.

### **Demethylase assays**

Cell culture-based demethylase activity assay for Utx/KDM6A and Jmjd3/KDM6B was performed previously (Narayanan et al., 2015) .

For Histone demethylase KDM1/LSD1 activity quantification, cultured dcKO\_CAG-Cre NSCs were nucleofected with a mammalian expression vector for LSD1/KDM1A. The Cre-mediated deletion of BAF155 and BAF170 alleles was induced by adding TAM to the growth medium at a final concentration of 1  $\mu$ M. After 2 DIV, The LSD1 demethylation assay was performed by using nuclear extracts from above NSCs and Epigenase LSD1 Demethylase activity Kit according to manufacturer (Epigentek)'s recommendations (Katz et al., 2014).

### **IF and cell cycle parameters**

IF experiments and determination of cell cycle indexes were carried out as previously described (Narayanan et al., 2015; Tuoc and Stoykova, 2008).

### **Spindle angle analysis**

Brain sections were stained with PVIM to outline the cell shape and PHH3 to identify anaphase and early telophase dividing cells. Images of z-stack sections were obtained by SP5 confocal microscopy, and 3D reconstruction of the confocal stacks was done as described previously (Postiglione et al., 2011; Tuoc et al., 2013).

### **3D reconstruction and cell counting**

3D images of the developing hippocampus were constructed using Neurolucida software version 11.03. Consecutive sections (25  $\mu$ m each) of the E15.5 WT and dcKO hippocampus were imaged in rostro-caudal order. Triple IF with antibodies against ZBTB20, PAX6 and PHH3 was performed to quantify the volume of the hippocampal plate (ZBTB20<sup>+</sup>/PAX6<sup>-</sup>), hippocampal neuroepithelium (ZBTB20<sup>-</sup>/PAX6<sup>+</sup>), and total

number of pHH3<sup>+</sup> M-phase cells in the apical surface of the developing hippocampus. Contours were drawn in each section based on the expression of the hippocampus-specific marker Zbt20. The 3D reconstruction was produced from whole-stack contours. The volume analysis was done using NeuroLucida Explorer v. 11.03.

### **Cell counts and quantitative analysis of IF signal intensity**

Immunostaining in IF images was quantified using anatomically matched forebrain sections. Nucleus-marker-positive cells within the pallium of confocal images were counted for comparison. In most cases, cell counts of six matched sections were averaged from three biological replicates (control/dcKO pallium). In many cases, the number of lineage marker cells was quantified using total marker-positive cells alone, or by normalizing to the total number of DAPI<sup>+</sup> (nucleus-stained) cells using the following equation: Normalized number = marker-positive cell number/DAPI<sup>+</sup> cell number. Statistical analyses of histological data were performed using Student's *t*-test. All bar graphs are plotted as means ± SEM. All statistical tests are two-tailed, and *P*-values are considered to be significant for  $\alpha = 0.05$ . All details of statistical analyses of histological experiments are presented in Table S6.

### **Statistical Analysis**

Statistical analyses were designed using the assumption of normal distribution and similar variance among groups, as previously tested. The sample size was determined based on preliminary results or similar experiments carried-out in the past. Power analysis was performed using G-power in order to estimate the number of animals required, for a signal-to-noise ratio of 1.4 and 80% to 90% power assuming a 5%

significance level. For histological analysis, qPCR, ChIP-qPCR and comparison of genome-wide histone marks, statistics were assessed with Student's *t*-test. The significance of overlaps was assessed using hypergeometric test. RNA-Seq and ChIP-Seq analyses were carried out using DESeq2 and DiffBind packages of Bioconductor respectively, with their own in-built statistical calculation tools. The results are presented as means  $\pm$  SEM. *P* values of  $< 0.05$  were considered to be statistically significant unless otherwise indicated. All the relevant information pertaining to statistical analysis is also specified in each figure legend separately. A detailed description of quantitative analysis methods is presented in Supplemental Information. The statistic quantification was carried out as average from at least three biological replicate. All details of statistical analyses for histological experiments are presented in Table S6.

## SUPPLEMENTAL REFERENCES

- Chen, J., Bardes, E.E., Aronow, B.J., and Jegga, A.G. (2009). ToppGene Suite for gene list enrichment analysis and candidate gene prioritization. *Nucleic acids research* 37, W305-311.
- Choi, J., Ko, M., Jeon, S., Jeon, Y., Park, K., Lee, C., Lee, H., and Seong, R.H. (2012). The SWI/SNF-like BAF complex is essential for early B cell development. *J Immunol* 188, 3791-3803.
- Conti, L., Pollard, S.M., Gorba, T., Reitano, E., Toselli, M., Biella, G., Sun, Y., Sanzone, S., Ying, Q.L., Cattaneo, E., *et al.* (2005). Niche-independent symmetrical self-renewal of a mammalian tissue stem cell. *PLoS Biol* 3, e283.
- De Santa, F., Totaro, M.G., Prosperini, E., Notarbartolo, S., Testa, G., and Natoli, G. (2007). The histone H3 lysine-27 demethylase Jmjd3 links inflammation to inhibition of polycomb-mediated gene silencing. *Cell* 130, 1083-1094.
- Djebali, S., Davis, C.A., Merkel, A., Dobin, A., Lassmann, T., Mortazavi, A., Tanzer, A., Lagarde, J., Lin, W., and Schlesinger, F. (2012). Landscape of transcription in human cells. *Nature* 489, 101-108.
- Durak, O., Gao, F., Kaeser-Woo, Y.J., Rueda, R., Martorell, A.J., Nott, A., Liu, C.Y., Watson, L.A., and Tsai, L.H. (2016). Chd8 mediates cortical neurogenesis via transcriptional regulation of cell cycle and Wnt signaling. *Nat Neurosci*.
- Feng, J., Liu, T., Qin, B., Zhang, Y., and Liu, X.S. (2012). Identifying ChIP-seq enrichment using MACS. *Nature protocols* 7, 1728-1740.
- Goebbels, S., Bormuth, I., Bode, U., Hermanson, O., Schwab, M.H., and Nave, K.A. (2006). Genetic targeting of principal neurons in neocortex and hippocampus of NEX-Cre mice. *Genesis* 44, 611-621.
- Gorski, J.A., Talley, T., Qiu, M., Puelles, L., Rubenstein, J.L., and Jones, K.R. (2002). Cortical excitatory neurons and glia, but not GABAergic neurons, are produced in the Emx1-expressing lineage. *J Neurosci* 22, 6309-6314.

Halder, R., Hennion, M., Vidal, R.O., Shomroni, O., Rahman, R.-U., Rajput, A., Centeno, T.P., van Bebber, F., Capece, V., and Vizcaino, J.C.G. (2016). DNA methylation changes in plasticity genes accompany the formation and maintenance of memory. *Nature neuroscience* *19*, 102-110.

Heinz, S., Benner, C., Spann, N., Bertolino, E., Lin, Y.C., Laslo, P., Cheng, J.X., Murre, C., Singh, H., and Glass, C.K. (2010). Simple combinations of lineage-determining transcription factors prime cis-regulatory elements required for macrophage and B cell identities. *Molecular cell* *38*, 576-589.

Katz, T.A., Vasilatos, S.N., Harrington, E., Oesterreich, S., Davidson, N.E., and Huang, Y. (2014). Inhibition of histone demethylase, LSD2 (KDM1B), attenuates DNA methylation and increases sensitivity to DNMT inhibitor-induced apoptosis in breast cancer cells. *Breast Cancer Res Treat* *146*, 99-108.

Li, H., Handsaker, B., Wysoker, A., Fennell, T., Ruan, J., Homer, N., Marth, G., Abecasis, G., and Durbin, R. (2009). The sequence alignment/map format and SAMtools. *Bioinformatics* *25*, 2078-2079.

Lienhard, M., Grimm, C., Morkel, M., Herwig, R., and Chavez, L. (2014). MEDIPS: genome-wide differential coverage analysis of sequencing data derived from DNA enrichment experiments. *Bioinformatics* *30*, 284-286.

Love, M.I., Huber, W., and Anders, S. (2014). Moderated estimation of fold change and dispersion for RNA-seq data with DESeq2. *Genome biology* *15*, 1.

Madisen, L., Zwingman, T.A., Sunkin, S.M., Oh, S.W., Zariwala, H.A., Gu, H., Ng, L.L., Palmiter, R.D., Hawrylycz, M.J., Jones, A.R., *et al.* (2010). A robust and high-throughput Cre reporting and characterization system for the whole mouse brain. *Nat Neurosci* *13*, 133-140.

Mao, Y., Ge, X., Frank, C.L., Madison, J.M., Koehler, A.N., Doud, M.K., Tassa, C., Berry, E.M., Soda, T., Singh, K.K., *et al.* (2009). Disrupted in schizophrenia 1 regulates neuronal progenitor proliferation via modulation of GSK3beta/beta-catenin signaling. *Cell* *136*, 1017-1031.

Narayanan, R., Pirouz, M., Kerimoglu, C., Pham, L., Wagener, R.J., Kiszka, K.A., Rosenbusch, J., Seong, R.H., Kessel, M., Fischer, A., *et al.* (2015). Loss of BAF (mSWI/SNF) Complexes Causes Global Transcriptional and Chromatin State Changes in Forebrain Development. *Cell Rep* *13*, 1842-1854.

Nicol, J.W., Helt, G.A., Blanchard, S.G., Raja, A., and Loraine, A.E. (2009). The Integrated Genome Browser: free software for distribution and exploration of genome-scale datasets. *Bioinformatics* *25*, 2730-2731.

Postiglione, M.P., Juschke, C., Xie, Y., Haas, G.A., Charalambous, C., and Knoblich, J.A. (2011). Mouse inscuteable induces apical-Basal spindle orientation to facilitate intermediate progenitor generation in the developing neocortex. *Neuron* *72*, 269-284.

Ross-Innes, C.S., Stark, R., Teschendorff, A.E., Holmes, K.A., Ali, H.R., Dunning, M.J., Brown, G.D., Gojis, O., Ellis, I.O., and Green, A.R. (2012). Differential oestrogen receptor binding is associated with clinical outcome in breast cancer. *Nature* *481*, 389-393.

Shen, L., Shao, N., Liu, X., and Nestler, E. (2014). ngs. plot: Quick mining and visualization of next-generation sequencing data by integrating genomic databases. *BMC genomics* *15*, 1.

Tuoc, T.C., Boretius, S., Sansom, S.N., Pitulescu, M.E., Frahm, J., Livesey, F.J., and Stoykova, A. (2013). Chromatin Regulation by BAF170 Controls Cerebral Cortical Size and Thickness. *Developmental Cell* *25*, 256-269.

Tuoc, T.C., and Stoykova, A. (2008). Trim11 modulates the function of neurogenic transcription factor Pax6 through ubiquitin-proteasome system. *Genes & development* *22*, 1972-1986.

Veeman, M.T., Slusarski, D.C., Kaykas, A., Louie, S.H., and Moon, R.T. (2003). Zebrafish prickle, a modulator of noncanonical Wnt/Fz signaling, regulates gastrulation movements. *Current biology : CB* *13*, 680-685.

Zhuo, L., Theis, M., Alvarez-Maya, I., Brenner, M., Willecke, K., and Messing, A. (2001). hGFAP-cre transgenic mice for manipulation of glial and neuronal function in vivo. *Genesis* *31*, 85-94.
